# Supplementary material for: Identification of the Genetic Basis for the Large-tailed Phenotypic Trait in Han Sheep Through Integrated mRNA&nbsp;and miRNA&nbsp;Analysis of Tail Fat Tissue Samples
Source: Research Square preprint supplement (doi:10.21203/rs.3.rs-107294/v1), 2020-11-18
Supplement: Supplementary file 1 [file 49035202cbd65c15334cf140.XLSX]

## Sheet: Sheet1
Table S4. Fourteen differentially expressed miRNAs in all conditions.
		Normalized count						Pvalue									log2 ratio									Expression pattern
miRName	Sequence	L1	L2	L3	S1	S2	S3	L1-S1	L1-S2	L1-S3	L2-S1	L2-S2	L2-S3	L3-S1	L3-S2	L3-S3	L1-S1	L1-S2	L1-S3	L2-S1	L2-S2	L2-S3	L3-S1	L3-S2	L3-S3	L1-S1	L1-S2	L1-S3	L2-S1	L2-S2	L2-S3	L3-S1	L3-S2	L3-S3
oar-let-7i	TGAGGTAGTAGTTTGTGCTGTT	34179	80169	100005	64846	71056	48384	0.419632	0.0199001	0.890052	0.361903	0.984334	0.0531266	0.495668	0.910031	0.0811171	0.562381	1.05585	-0.0500799	-0.529989	0.00648424	-1.19494	-0.465111	0.0594973	-1.04747	ns	Up	ns	ns	Down	Down	ns	ns	Down
oar-miR-133	TTGGTCCCCTTCAACCAGCTGT	289	392	606	297	1158	559	0.658774	5.89e-05	0.354586	0.323574	1.94928e-06	0.947534	0.222073	0.00754863	0.853727	-0.322132	2.00249	0.400279	-0.624353	1.74328	0.0455717	-0.868983	1.48679	-0.11647	ns	Up	ns	ns	ns	ns	ns	Up	ns
oar-miR-150	TCTCCCAACCCTTGTACCAGTG	548	956	872	763	606	1676	0.872378	0.76901	0.00724528	0.361597	0.182504	0.581279	0.964371	0.96187	0.123113	0.115981	0.145142	1.06127	-0.54929	-0.477121	0.343517	-0.0327734	0.0275307	0.942622	ns	ns	Up	ns	Up	ns	ns	ns	ns
oar-miR-221	AGCTACATTGTCTGCTGGGTTT	1963	5997	7221	4832	4260	3610	0.181925	0.0153662	0.38333	0.359448	0.349394	0.0532889	0.539675	0.697907	0.0969871	0.938034	1.11779	0.327439	-0.535583	-0.312815	-1.19867	-0.419707	-0.208804	-1.0002	ns	Up	ns	ns	ns	Down	ns	ns	Down
oar-miR-30a-3p	CTTTCAGTCGGATGTTTGCAG	4123	9170	9528	7842	8298	4886	0.417604	0.0270517	0.407893	0.440346	0.913018	0.0270793	0.859375	0.50854	0.109206	0.566001	1.00907	-0.30654	-0.449663	0.0364142	-1.37469	-0.12108	0.353131	-0.96352	ns	Up	ns	ns	ns	Down	ns	ns	ns
oar-miR-376c-3p	AACATAGAGGAAATTCCACGT	53	42	99	257	53	83	0.0140445	1	0.914005	0.0012239	0.442488	0.53265	0.0423455	0.628787	0.7463	1.91618	0	0.0956192	2.38934	0.516175	0.516299	1.53614	-0.348895	-0.254317	Up	ns	ns	Up	ns	ns	Up	ns	ns
oar-miR-381-3p	ATATACAAGGGCAAGCTCTCT	166	166	167	137	145	115	0.396703	0.74686	0.0411562	0.471504	0.990717	0.153613	0.876003	0.572636	0.445207	-0.638533	-0.19513	-1.08105	-0.50097	-0.0145581	-0.995972	-0.125801	0.348746	-0.538214	ns	ns	Down	ns	ns	ns	ns	ns	ns
oar-miR-411a-5p	ATAGTAGACCGTATAGCGTACG	15583	13227	20877	7447	15334	15910	0.0438224	0.958945	0.15479	0.0730783	0.234976	0.742808	0.0555452	0.839585	0.51059	-1.42677	-0.0232389	-0.521539	-1.05272	0.39382	-0.199975	-1.32731	0.107361	-0.391981	Down	ns	ns	Down	ns	ns	Down	ns	ns
oar-miR-495-3p	AAACAAACATGGTGCACTTCTT	131	54	145	283	49	133	0.312782	0.0368294	0.330253	0.00254147	0.983934	0.269164	0.128455	0.132681	0.868561	0.749709	-1.41871	-0.52964	2.16581	0.0403946	0.833972	1.12462	-1.01266	-0.124627	ns	Down	ns	Up	ns	ns	Up	Down	ns
oar-miR-543-3p	AAACATTCGCGGTGCACTTCTTT	50	21	47	54	12	82	0.786307	0.0438613	0.838081	0.254359	0.593232	0.0862046	0.699168	0.135818	0.326612	-0.250495	-2.05889	0.162196	1.13861	-0.626783	1.49881	0.36017	-1.41709	0.802963	ns	Down	ns	Up	ns	Up	ns	Down	ns
oar-miR-412-3p	TGGTCGACCAGTTGGAAAGTAAT	14	29	74	15	24	36	0.881343	0.546372	0.472964	0.327297	0.962957	0.903152	0.0262987	0.176686	0.22261	-0.26199	0.777608	0.81107	-1.17505	-0.0924462	-0.154479	-2.14269	-1.07195	-1.03953	ns	ns	ns	Down	ns	ns	Down	Down	Down
oar-miR-154a-3p	AATCATACACGGTTCACCTATT	6	5	5	12	9	25	0.726183	0.830359	0.310572	0.534943	0.48192	0.133506	0.411679	0.413872	0.105576	0.638474	0.584963	1.50739	1.361	1.3505	2.17743	1.42291	1.40054	2.32193	ns	ns	Up	Up	ns	Up	Up	Up	Up
oar-miR-655-3p	ATAATACATGGTTAACCTCTCT	87	71	164	298	72	86	0.0610303	0.706598	0.360449	0.00825692	0.742038	0.817387	0.164538	0.327294	0.193983	1.4147	-0.273018	-0.568178	1.84546	0.20075	-0.189905	1.02149	-0.635086	-0.931287	Up	ns	ns	Up	Up	ns	Up	ns	ns
oar-miR-376a-5p	TAGATTCTCCTTCTATGAGTAC	52	37	39	53	35	142	0.708636	0.514885	0.147514	0.767984	0.931563	0.0563783	0.514418	0.648963	0.0164138	-0.334045	-0.571157	0.897808	0.294505	0.100402	1.47387	0.60239	0.396422	1.86434	ns	ns	ns	ns	ns	Up	ns	ns	Up
