# Supplementary material for: Identification of the Genetic Basis for the Large-tailed Phenotypic Trait in Han Sheep Through Integrated mRNA&nbsp;and miRNA&nbsp;Analysis of Tail Fat Tissue Samples
Source: Research Square preprint supplement (doi:10.21203/rs.3.rs-107294/v1), 2020-11-18
Supplement: Supplementary file 2 [file d7fd41f280bcfc34e437877c.xlsx]

## Sheet: 工作表1
Table S6. GO terms of biological process, cellular components, and molecular function of tail adipose tissues specific differentially expressed genes (DEGs).
	Categories	GO ID	Terms	Count	P-value
L1-S1	Biological process	GO:0006412	translation	4	1.0 E-02
	Cellualr component	GO:0005737	cytoplasm	15	0.029
		GO:0005576	extracellular region	10	9.8 E-03
		GO:0043226	organelle	20	1.4 E-02
	Molecular Function	GO:0005198	structural molecule activity	7	5.2e-05
L1-S2	Biological process	GO:0009058	biosynthetic process	35	1.9 E-02
		GO:0006629	lipid metabolic process	9	3.9 E-02
		GO:0000988	protein binding transcription factor activity	5	4.8 E-02
		GO:0042254	response to stress	19	1.4 E-02
		GO:0022610	ribosome biogenesis	3	2.0 E-02
		GO:0006412	translation	13	3.29e-05
	Cellualr component	GO:0005737	cytoplasm	53	1.9 E-03
		GO:0005576	extracellular region	27	1.5 E-02
		GO:0005615	extracellular space	10	1.3 E-02
		GO:0005622	intracellular	69	1.0 E-02
		GO:0043226	organelle	72	3.1 E-04
	Molecular Function	GO:0005198	structural molecule activity	15	1.12e-05
L1-S3	Biological process	GO:0007155	cell adhesion	24	2.7 E-02
		GO:0008219	cell death	38	1.7 E-02
		GO:0048870	cell motility	28	4.9 E-02
		GO:0016798	hydrolase activity, acting on glycosyl bonds	9	2.3 E-03
		GO:0002376	immune system process	47	4.4 E-03
		GO:0006629	lipid metabolic process	36	9.97e-05
		GO:0016491	oxidoreductase activity	31	3.1 E-03
		GO:0006457	protein folding	8	2.6 E-02
		GO:0006950	response to stress	62	5.2 E-03
		GO:0044281	small molecule metabolic process	73	9.4 E-04
		GO:0016746	transferase activity, transferring acyl groups	12	6.4 E-03
		GO:0006412	translation	21	3.3 E-02
	Cellular component	GO:0005737	cytoplasm	174	1.3 E-02
		GO:0005576	extracellular region	125	8.6e-11
		GO:0005615	extracellular space	39	4.1e-06
		GO:0043226	organelle	245	1.9 E-03
	Molecular Function	GO:0003674	molecular function	397	2.7 E-04
		GO:0008092	cytoskeletal protein binding	20	4.8 E-02
		GO:0030234	enzyme regulator activity	23	7.0 E-03
		GO:0051082	unfolded protein binding	5	2.6 E-02
L2-S1	Biological process	GO:0048856	anatomical structure development	60	9.5 E-03
		GO:0009058	biosynthetic process	68	4.0 E-02
		GO:0008219	cell death	27	1.8 E-03
		GO:0030154	cell differentiation	44	9.3 E-03
		GO:0051186	cofactor metabolic process	6	2.0 E-02
		GO:0042592	homeostatic process	19	4.8 E-02
		GO:0006629	lipid metabolic process	18	1.4 E-02
		GO:0007067	mitosis	6	2.4 E-02
	Cellular component	GO:0005737	cytoplasm	102	9.2 E-03
		GO:0005829	cytosol	17	1.5 E-02
		GO:0005576	extracellular region	62	1,6 E-04
		GO:0005615	extracellular space	17	2.1 E-02
		GO:0005622	intracellular	148	2.4 E-03
		GO:0043226	organelle	143	1.2 E-03
		GO:0005578	proteinaceous extracellular matrix	8	9.2 E-03
L2-S2	Biological process	GO:0048856	anatomical structure development	58	2.7 E-02
		GO:0048646	anatomical structure formation involved in morphogenesis	19	1.3 E-02
		GO:0008219	cell death	22	4.5 E-02
		GO:0030154	cell differentiation	48	1.6 E-03
		GO:0000902	cell morphogenesis	17	4.0 E-02
		GO:0009790	embryo development	21	5.0 E-03
		GO:0040007	growth	15	2.2 E-02
		GO:0016757	transferase activity, transferring glycosyl groups	8	2.0 E-02
	Cellular component	GO:0043226	organelle	135	3.6 E-02
L2-S3	Biological process	GO:0051186	cofactor metabolic process	4	4.2 E-03
		GO:0030198	extracellular matrix organization	3	2.8 E-02
		GO:0016491	oxidoreductase activity	7	3.6 E-02
		GO:0006790	sulfur compound metabolic process	3	1.6 E-02
	Cellular component	GO:0005576	extracellular region	22	3.4 E-03
	Molecular Function	GO:0005198	structural molecule activity	9	1.7 E-03
L3-S1	Biological process	GO:0007568	aging	3	3.9 E-02
		GO:0048856	anatomical structure development	44	1.1 E-03
		GO:0007155	cell adhesion	14	1.1 E-03
		GO:0008219	cell death	16	2.2 E-02
		GO:0030154	cell differentiation	28	2.6 E-02
		GO:0000902	cell morphogenesis	12	3.2 E-02
		GO:0008283	cell proliferation	17	1.7 E-02
		GO:0007010	cytoskeleton organization	14	2.9 E-03
		GO:0030198	extracellular matrix organization	5	1.1 E-02
		GO:0002376	immune system process	19	1.3 E-02
		GO:0007005	mitochondrion organization	5	3.8 E-02
		GO:0044403	symbiosis, encompassing mutualism through parasitism	7	1.2 E-02
	Cellular component	GO:0005737	cytoplasm	63	4.2 E-02
		GO:0005576	extracellular region	43	1.4 E-04
		GO:0005615	extracellular space	14	3.5 E-03
		GO:0043226	organelle	86	3.2 E-02
		GO:0005578	proteinaceous extracellular matrix	7	2.4 E-03
	Molecular Function	GO:0003674	molecular function	136	4.2 E-02
		GO:0008092	cytoskeletal protein binding	9	4.2 E-02
		GO:0005198	structural molecule activity	14	1.5 E-03
L3-S2	Biological process	GO:0048856	anatomical structure development	55	1.7 E-03
		GO:0048646	anatomical structure formation involved in morphogenesis	20	6.4 E-04
		GO:0009058	biosynthetic process	63	5.4 E-03
		GO:0009056	catabolic process	34	1.2 E-02
		GO:0007155	cell adhesion	13	3.2 E-02
		GO:0008219	cell death	19	4.0 E-02
		GO:0030154	cell differentiation	37	1.5 E-02
		GO:0034330	cell junction organization	5	1.3 E-02
		GO:0048870	cell motility	19	2.6 E-03
		GO:0008283	cell proliferation	22	1.1 E-02
		GO:0034641	cellular nitrogen compound metabolic process	69	1.1 E-02
		GO:0006464	cellular protein modification process	39	4.1 E-03
		GO:0009790	embryo development	16	2.5 E-02
		GO:0002376	immune system process	30	1.5 E-04
		GO:0040011	locomotion	20	6.4 E-02
		GO:0043473	pigmentation	3	4.6 E-02
		GO:0051604	protein maturation	21	2.8 E-02
		GO:0006950	response to stress	32	8.9 E-03
		GO:0044281	small molecule metabolic process	33	2.9 E-02
		GO:0044403	symbiosis, encompassing mutualism through parasitism	6	4.4 E-02
	Cellular component	GO:0005623	cell	136	3.5 E-02
		GO:0005737	cytoplasm	97	8e-05
		GO:0005576	extracellular region	45	1.8 E-02
		GO:0005615	extracellular space	15	1.9 E-02
		GO:0005622	intracellular	125	3.2 E-03
		GO:0005635	nuclear envelope	6	2.0 E-02
		GO:0043226	organelle	122	1.0 E-03
		GO:0043234	protein complex	45	4.4 E-02
	Molecular Function	GO:0008092	cytoskeletal protein binding	12	2.2 E-02
		GO:0043167	ion binding	65	2.5 E-02
L3-S3	Biological process	GO:0007267	cell-cell signaling	6	1.8 E-02
		GO:0042592	homeostatic process	12	2.8 E-02
		GO:0016779	nucleotidyltransferase activity	1	4.7 E-03
		GO:0006457	protein folding	2	4.5 E-02
		GO:0044281	small molecule metabolic process	30	1.4 E-02
		GO:0006790	sulfur compound metabolic process	5	1.4 E-02
		GO:0016746	transferase activity, transferring acyl groups	4	2.0 E-04
		GO:0016757	transferase activity, transferring glycosyl groups	3	2.3 E-02
	Cellular component	GO:0005575	cellular component	108	2.4 E-02
		GO:0005623	cell	136	1.1 E-03
		GO:0030312	external encapsulating structure	1	4.75e-08
		GO:0005576	extracellular region	64	3.5 E-02
		GO:0005615	extracellular space	14	2.0 E-02
		GO:0005654	nucleoplasm	5	8.49e-05
		GO:0005886	plasma membrane	47	1.7 E-02
	Molecular Function	GO:0032182	small conjugating protein binding	70	4.9 E-04
